# Supplementary material
Source: publisher site journal article supplement (https://www.dovepress.com/article/578185)
Supplement: Supplementary file 1 [file 578185_Appendix A.pdf › 578185_Appendix A.pdf]

## Appendix A: Summary of Interventions

**Acronyms and Abbreviations:** **CDP:** Computerized Dynamic Posturography; **COG:** Center of Gravity, **LOS:** Limits of Stability, **ADT:** Adaptation Test, **MCT:** Motor Control Test, **SOT:** Sensory Organization Test, **STS:** Sit to Stand, **VOR:** Vestibulo-ocular Reflex

| Session # | Training Focus                                                                                                                                                                                                                                 | CDP                                                                                                                                                                                                                                                                                              | Overground                                                                                                                                                                                                                                                                                           | Home Exercise Program                                                                                                                                                                                                       |
|-----------|------------------------------------------------------------------------------------------------------------------------------------------------------------------------------------------------------------------------------------------------|--------------------------------------------------------------------------------------------------------------------------------------------------------------------------------------------------------------------------------------------------------------------------------------------------|------------------------------------------------------------------------------------------------------------------------------------------------------------------------------------------------------------------------------------------------------------------------------------------------------|-----------------------------------------------------------------------------------------------------------------------------------------------------------------------------------------------------------------------------|
| 1         | <ul style="list-style-type: none"> <li>• Maintaining neutral COG alignment</li> <li>• Increasing limits of stability in the direction of impairment</li> <li>• Improving translation of COG during functional activity</li> </ul>              | <p><b>Tasks:</b> Align center, center-anterior, center right posterior, left lateral-right lateral</p> <p><b>Pacing:</b> 4 seconds</p> <p><b>Scene:</b> blank, white wall</p> <p><b>LOS:</b> 40–50%</p> <p><b>Trials:</b> 10 trials, 1 minute each</p>                                           | <ul style="list-style-type: none"> <li>• Sit-to-stands (STS) three sets of five</li> <li>• Lateral weight shifts in parallel bars</li> <li>• Anterior weight shifts in parallel bars</li> <li>• Posterior and rightward weight shifts in parallel bars</li> </ul>                                    | <ul style="list-style-type: none"> <li>• STS three sets of five daily.</li> </ul>                                                                                                                                           |
| 2         | <ul style="list-style-type: none"> <li>• Maintaining neutral COG with unreliable somatosensory input</li> <li>• Increasing limits of stability in the direction of impairment</li> <li>• Decreasing trunk motion with weight shifts</li> </ul> | <p><b>Tasks:</b> Align center with sway gain*: 0, .75, -0.5<br/>Center posterior, left lateral-right lateral, center right posterior no sway</p> <p><b>Pacing:</b> 4 seconds</p> <p><b>Scene:</b> blank, white wall</p> <p><b>LOS:</b> 40–50%</p> <p><b>Trials:</b> 11 trials, 1 minute each</p> | <ul style="list-style-type: none"> <li>• Lateral weight shifts in parallel bars using mirror</li> <li>• Right posterior weight shift in parallel bars</li> <li>• Focused on weight shifting without trunk flexion</li> <li>• Used dycem under right foot as feedback to keep toes planted</li> </ul> | <p>Add:</p> <ul style="list-style-type: none"> <li>• Core-stability exercises in supine</li> <li>• Standing weight shifts beside kitchen island (lateral, anterior, right posterior directions) x 2 minutes each</li> </ul> |
| 3         | <ul style="list-style-type: none"> <li>• Improving postural control with unreliable somatosensory input</li> </ul>                                                                                                                             | <p><b>Tasks:</b> Align center with sway gain: 0, +0.25, -0.25<br/>Circle left no sway gain</p> <p><b>Pacing:</b> 4 seconds</p>                                                                                                                                                                   | <ul style="list-style-type: none"> <li>• Standing on foam pad, COG shifts in three directions (side-to-side,</li> </ul>                                                                                                                                                                              | No revisions                                                                                                                                                                                                                |

|   |                                                                                                                                                                                                                                                                                  |                                                                                                                                                                                                                                             |                                                                                                                                                                                                                                                                                         |                                                                   |
|---|----------------------------------------------------------------------------------------------------------------------------------------------------------------------------------------------------------------------------------------------------------------------------------|---------------------------------------------------------------------------------------------------------------------------------------------------------------------------------------------------------------------------------------------|-----------------------------------------------------------------------------------------------------------------------------------------------------------------------------------------------------------------------------------------------------------------------------------------|-------------------------------------------------------------------|
|   |                                                                                                                                                                                                                                                                                  | <b>Scene:</b> blank, white wall<br><b>LOS:</b> 50%<br><b>Trials:</b> seven trials, 1 minute each<br><b>Perturbation Training:</b><br>ADT x 1                                                                                                | forward, back-right) for 2 minutes each                                                                                                                                                                                                                                                 |                                                                   |
| 4 | <ul style="list-style-type: none"> <li>Improving automatic postural control</li> <li>Maintaining neutral COG with unreliable somatosensory input</li> <li>Improving use of core-stabilization strategies in standing</li> </ul>                                                  | <b>Tasks:</b><br>Align center with sway gain: 0, 0.25, -0.25<br><b>Pacing:</b> not applicable<br><b>Scene:</b> blank, white wall<br><b>LOS:</b> N/A<br><b>Trials:</b> six trials, 1 minute each<br><b>Perturbation training:</b><br>ADT x 2 | <ul style="list-style-type: none"> <li>Neuromuscular re-education: Tactile feedback at bilateral anterior superior iliac spines to guide COG forward</li> <li>Tactile feedback at bilateral gluteals to guide COG backward</li> <li>Core stabilization exercises in standing</li> </ul> | No revisions                                                      |
| 5 | <ul style="list-style-type: none"> <li>Improving postural control with increasingly unreliable somatosensory input</li> <li>Integrating postural control strategies with gait and other functional activities</li> <li>Maintaining postural control with dual tasking</li> </ul> | <b>Tasks:</b> Align center with sway gain: 0, +0.25, -0.25, 0.50<br><b>Pacing:</b> not applicable<br><b>Scene:</b> blank, white wall<br><b>LOS:</b> not applicable<br><b>Trials:</b> four trials, 1 minute each                             | <ul style="list-style-type: none"> <li>Gait training</li> </ul>                                                                                                                                                                                                                         | Add:<br>Ball toss in corner x 3 minutes while listening to music. |
| 6 | <ul style="list-style-type: none"> <li>Improving automatic postural control</li> </ul>                                                                                                                                                                                           | <b>Tasks:</b> Virtual reality – visual flow training<br><b>Scene:</b> Park                                                                                                                                                                  | No overground training due to time constraints                                                                                                                                                                                                                                          | No changes                                                        |

|   |                                                                                                                                                                            |                                                                                                                                                                                                                                                                                                                                                                                                                  |                                                                                                                        |              |
|---|----------------------------------------------------------------------------------------------------------------------------------------------------------------------------|------------------------------------------------------------------------------------------------------------------------------------------------------------------------------------------------------------------------------------------------------------------------------------------------------------------------------------------------------------------------------------------------------------------|------------------------------------------------------------------------------------------------------------------------|--------------|
|   | <ul style="list-style-type: none"> <li>Improving sensory integration</li> </ul>                                                                                            | <p> <b>Scene movement:</b><br/> slow, medium<br/> <b>Central density:</b><br/> high<br/> <b>Peripheral density:</b><br/> high<br/> <b>Obstacles:</b> off<br/> <b>Distraction frequency:</b> off<br/> <b>Cognitive load:</b> off, medium<br/> <b>Lighting:</b> daylight<br/> <b>COG guides:</b> on<br/> <b>Trials:</b> 12 trials, 1 minute each<br/> <b>Perturbation training:</b><br/> ADT x 2<br/> MCT x 2 </p> |                                                                                                                        |              |
| 7 | <ul style="list-style-type: none"> <li>Improving postural control under complex visual conditions</li> <li>Improving postural control with obstacle negotiation</li> </ul> | <p> <b>Tasks:</b> Virtual reality – visual flow training<br/> <b>Scene:</b> Park<br/> <b>Scene movement:</b><br/> slow, medium<br/> <b>Central density:</b><br/> high<br/> <b>Peripheral density:</b><br/> low<br/> <b>Obstacles:</b> dynamic<br/> <b>Distraction frequency:</b> high<br/> <b>Cognitive load:</b> off<br/> <b>Lighting:</b> daylight<br/> <b>COG guides:</b> on </p>                             | <ul style="list-style-type: none"> <li>Lateral weight shifts</li> <li>Posterior and rightward weight shifts</li> </ul> | No revisions |

|   |                                                                                                                                                                                                                                                                                    |                                                                                                                                                                                                                                                                                                                                                                                            |                                                                                |                                                                                                                        |
|---|------------------------------------------------------------------------------------------------------------------------------------------------------------------------------------------------------------------------------------------------------------------------------------|--------------------------------------------------------------------------------------------------------------------------------------------------------------------------------------------------------------------------------------------------------------------------------------------------------------------------------------------------------------------------------------------|--------------------------------------------------------------------------------|------------------------------------------------------------------------------------------------------------------------|
|   |                                                                                                                                                                                                                                                                                    | <b>Trials:</b> seven trials,<br>1–2 minutes each                                                                                                                                                                                                                                                                                                                                           |                                                                                |                                                                                                                        |
| 8 | <ul style="list-style-type: none"> <li>Improving automatic postural control</li> <li>Increasing limits of stability in the direction of impairments</li> <li>Improving postural control under complex visual conditions</li> </ul>                                                 | <b>Tasks:</b> Align center, center-anterior, center right posterior, left lateral-right lateral<br><br><b>Scene:</b> checkered room<br><b>Trials:</b> four trials, 1 minute each<br><b>Perturbation training:</b> MCT x 2                                                                                                                                                                  | <ul style="list-style-type: none"> <li>Gait training</li> </ul>                | No revisions                                                                                                           |
| 9 | <ul style="list-style-type: none"> <li>Improving sensory integration</li> <li>Improving postural control under complex visual conditions</li> <li>Maintaining postural control with dual tasking</li> <li>Improving eye-head coordination for stability of visual scene</li> </ul> | <b>Tasks:</b> Virtual reality – visual flow training<br><b>Scene:</b> Park<br><b>Scene movement:</b> slow, medium<br><b>Central density:</b> high<br><b>Peripheral density:</b> low<br><b>Obstacles:</b> dynamic<br><b>Distraction frequency:</b> high<br><b>Cognitive load:</b> on<br><b>Lighting:</b> daylight<br><b>COG guides:</b> on<br><b>Trials:</b> seven trials, 1–2 minutes each | <ul style="list-style-type: none"> <li>Review of all Home Exercises</li> </ul> | Add: <ul style="list-style-type: none"> <li>VOR X 1 exercises and saccade exercises in the seated position.</li> </ul> |

\*Gain refers to the movement of the image (camera gain) or platform movement (sway gain) in response to an individual's postural sway. When the sway-referencing is set to 1.0, the movement of the scene or force plate matches the patient's sway exactly, distorting the sensory input in a 1:1 ratio. When set to 0.0, the sensory environment remains stationary, leaving the somatosensory input intact. A sway gain set to -1.0 results in a platform tilt equal and opposite in direction of the patient's sway.
